# Supplementary material for: The vaginal microbiome during pregnancy and the postpartum period in a European population
Source: PubMed Central journal article supplement (PMC4355684; doi:10.1038/srep08988), 2015-03-11
Supplement: srep08988-s1.pdf [file srep08988-s1.pdf]

**The vaginal microbiome during pregnancy and the postpartum period in a  
European population.**

David A. MacIntyre<sup>1\*</sup>, Manju Chandiramani<sup>1</sup>, Yun S Lee<sup>1</sup>, Lindsay Kindinger<sup>1</sup>,  
Ann Smith<sup>2</sup>, Nicos Angelopoulos<sup>3</sup>, Benjamin C Lehne<sup>4</sup>, Shankari Arulkumaran<sup>1</sup>,  
Richard Brown<sup>1</sup>, Tiong Ghee Teoh<sup>5</sup>, Elaine Holmes<sup>6</sup>, Jeremy K Nicholson<sup>6,7</sup>,  
Julian R Marchesi<sup>3,6</sup> and Phillip R Bennett<sup>1</sup>.

**SUPPLEMENTARY INFORMATION**

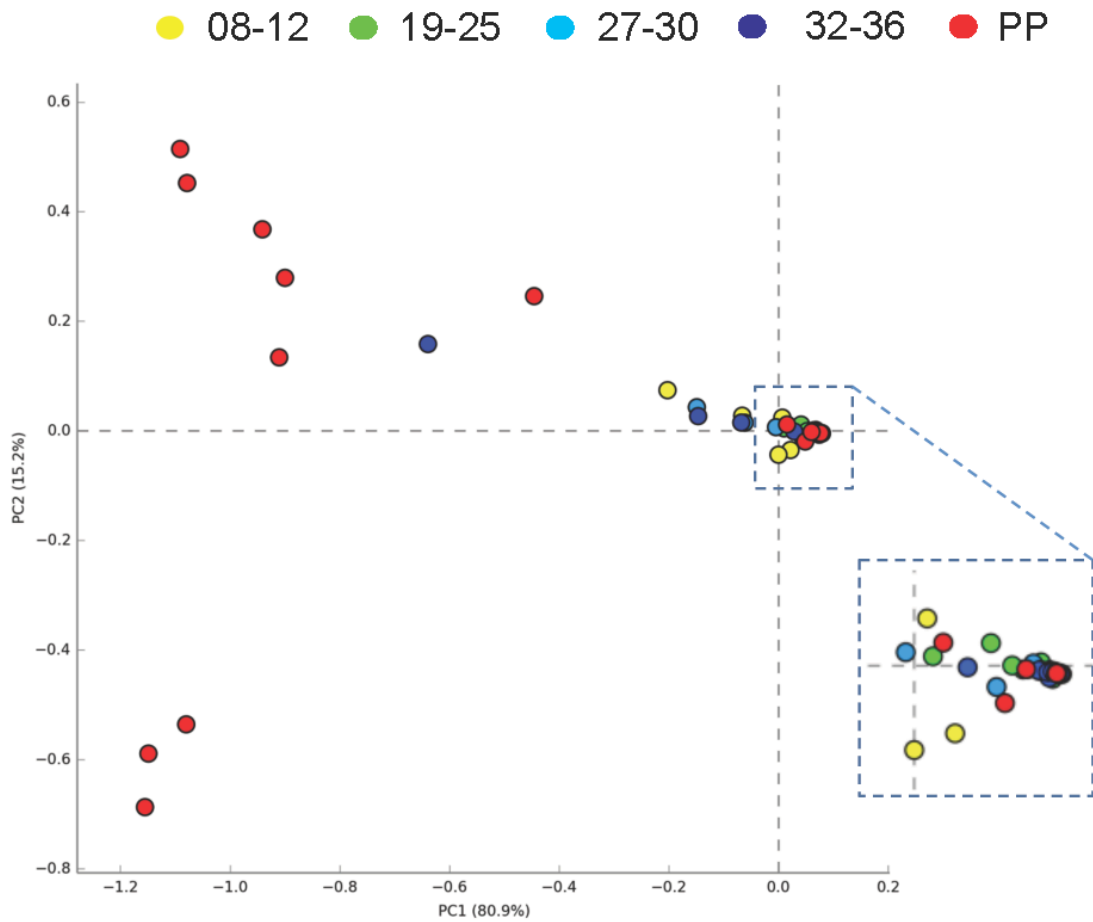

**Supplementary Figure 1.** PCA of bacterial genera data collected from patients at 8-12 (yellow), 19-25 (green), 27-30 (light blue) and 32-36 (dark blue) weeks gestation or 6 weeks post partum (PP; red).

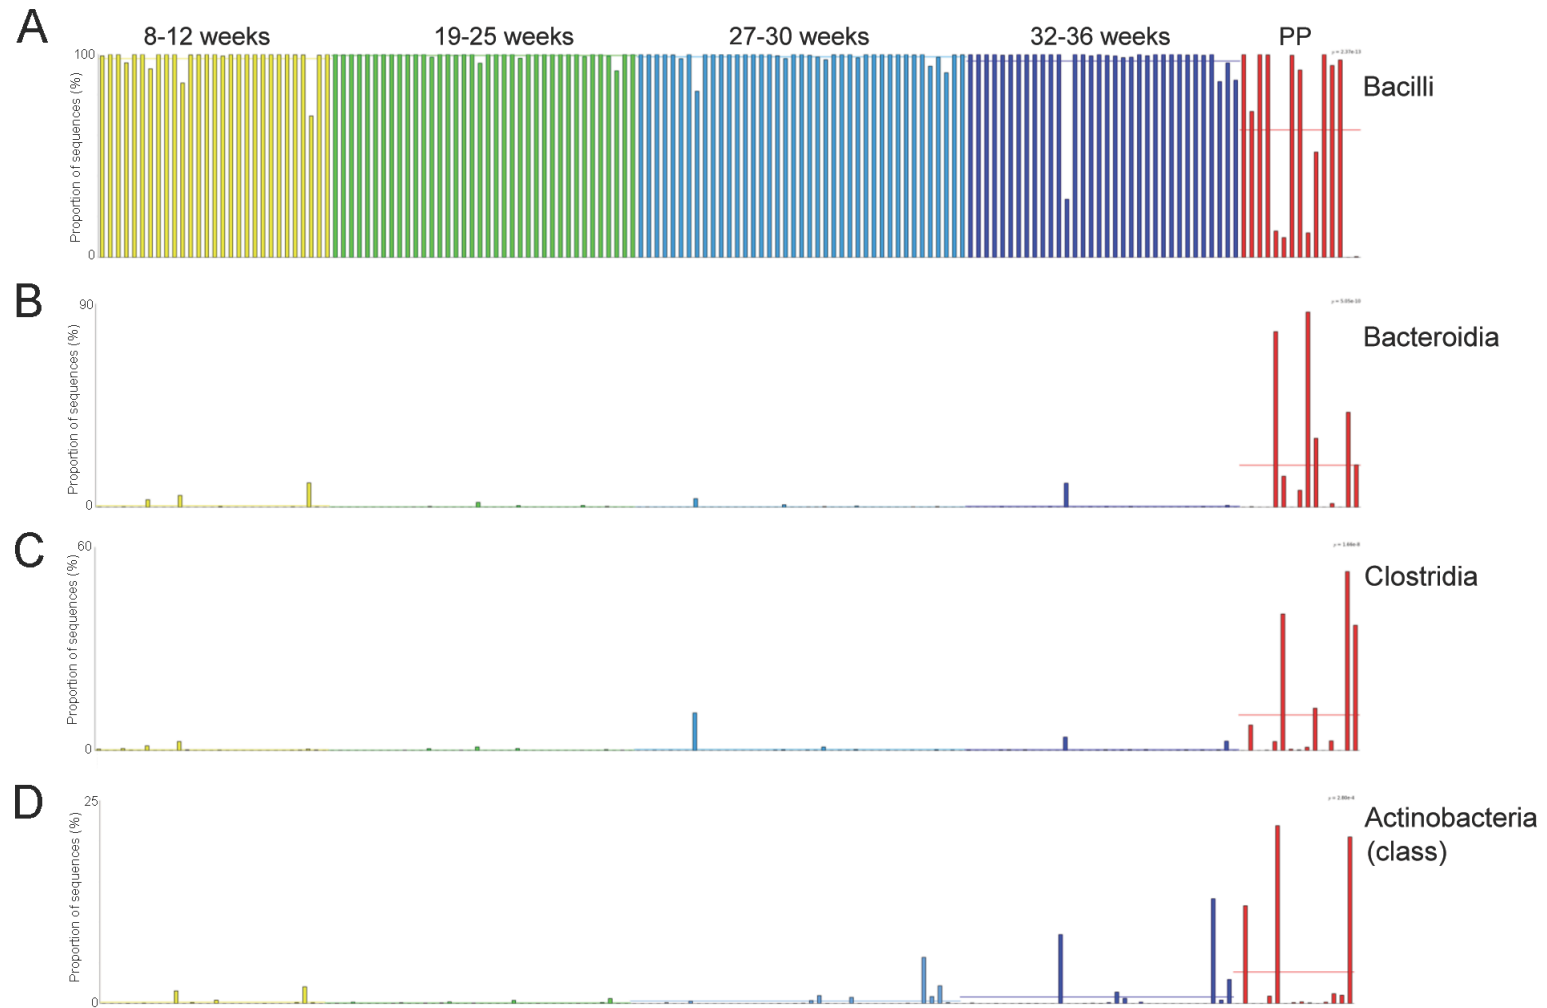

**Supplementary Figure 2. Relative abundance of bacterial classes in cross sectional data collected from patients at 8-12 (yellow), 19-25 (green), 27-30 (light blue) and 32-36 (dark blue) weeks gestation or 6 weeks post partum (PP; red). Data is presented to as proportion of sequences assigned to bacterial classes (A) Bacilli, (B) Bacteroidia, (C) Clostridia or (D) Actinobacteria.**

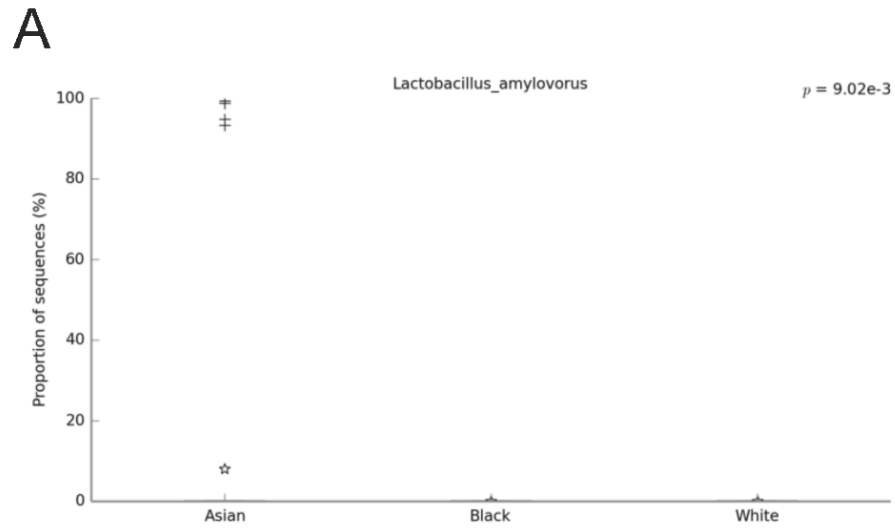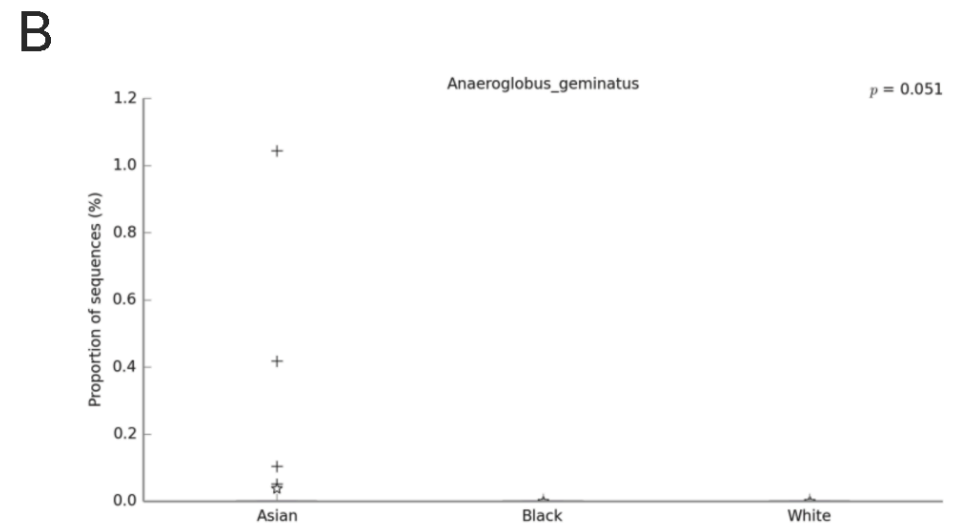

**Supplementary Figure 3. Bacterial species detected predominately in Asian samples.** Box plot describing proportion of sequences derived from **(A)** *Lactobacillus amylovorus* and **(B)** *Anaeroglobus germinatus*. Star indicates mean proportion of group.

**Supplementary Table 1. Linear mixed model regression analysis for examining bacterial species abundance across pregnancy time points.** To test if bacterial species abundance changes significantly over the course of pregnancy we excluded postpartum measurements and performed a linear regression for each microorganism. Abundances were log-transformed and regressed against time and adjusted for ethnicity and patient ID, whereby patient ID is modelled as a random effect to account for the correlation between samples of the same individual. “NA” indicates a lack of convergence in the model because of too few data-points. Fold changes are reported as NAs if values in one of the two groups are 0 or if the corresponding regression-metrics are non-zero.

| Species                          | Fold Change | Estimate | Std. Error | t value | P value | Q value |
|----------------------------------|-------------|----------|------------|---------|---------|---------|
| <i>Lactobacillus_crispatus</i>   | 1.2802      | 0.0056   | 0.0260     | 0.2168  | 8.3E-01 | 1.0E+00 |
| <i>Lactobacillus_iners</i>       | -1.3837     | -0.0305  | 0.0332     | -0.9179 | 3.6E-01 | 1.0E+00 |
| <i>Lactobacillus_jensenii</i>    | -1.0210     | -0.0290  | 0.0397     | -0.7314 | 4.6E-01 | 1.0E+00 |
| <i>Lactobacillus_gasseri</i>     | -1.1092     | 0.0556   | 0.0481     | 1.1555  | 2.5E-01 | 1.0E+00 |
| <i>Lactobacillus_amylovorus</i>  | 1.1531      | 0.0031   | 0.0030     | 1.0304  | 3.0E-01 | 1.0E+00 |
| <i>Prevotella_timonensis</i>     | -3.8382     | 0.0086   | 0.0334     | 0.2578  | 8.0E-01 | 1.0E+00 |
| <i>Prevotella_bivia</i>          | 4.5640      | -0.0134  | 0.0292     | -0.4591 | 6.5E-01 | 1.0E+00 |
| <i>Streptococcus_agalactiae</i>  | 38.8851     | -0.0269  | 0.0195     | -1.3787 | 1.7E-01 | 1.0E+00 |
| <i>Unclassified</i>              | -1.8171     | -0.0023  | 0.0232     | -0.1007 | 9.2E-01 | 1.0E+00 |
| <i>Atopobium_vaginae</i>         | -12.2966    | 0.0411   | 0.0314     | 1.3085  | 1.9E-01 | 1.0E+00 |
| <i>Finegoldia_magna</i>          | -1.0441     | 0.0143   | 0.0251     | 0.5692  | 5.7E-01 | 1.0E+00 |
| <i>Lactobacillus_delbrueckii</i> | 42.8582     | -0.0147  | 0.0126     | -1.1611 | 2.5E-01 | 1.0E+00 |
| <i>Sneathia_sanguinegens</i>     | NA          | 0.0616   | 0.0628     | 0.9809  | 3.3E-01 | 1.0E+00 |
| <i>Prevotella_disiens</i>        | 2.3448      | -0.0059  | 0.0083     | -0.7096 | 4.8E-01 | 1.0E+00 |
| <i>Prevotella_amnii</i>          | NA          | NA       | NA         | NA      | NA      | NA      |
| <i>Streptococcus_anginosus</i>   | 1.7241      | 0.0087   | 0.0184     | 0.4716  | 6.4E-01 | 1.0E+00 |
| <i>Ureaplasma_parvum</i>         | 5.3038      | -0.0083  | 0.0178     | -0.4690 | 6.4E-01 | 1.0E+00 |
| <i>Anaerococcus_vaginalis</i>    | -7.6765     | 0.0221   | 0.0153     | 1.4481  | 1.5E-01 | 1.0E+00 |
| <i>Aerococcus_christensenii</i>  | -3.7557     | 0.0331   | 0.0308     | 1.0724  | 2.8E-01 | 1.0E+00 |
| <i>Prevotella_buccalis</i>       | NA          | -0.0278  | 0.0200     | -1.3915 | 1.6E-01 | 1.0E+00 |
| <i>Dialister_micraerophilus</i>  | -1.5993     | 0.0061   | 0.0121     | 0.5040  | 6.1E-01 | 1.0E+00 |

|                                          |         |         |        |         |         |         |
|------------------------------------------|---------|---------|--------|---------|---------|---------|
| <i>Prevotella_corporis</i>               | NA      | -0.0120 | 0.0117 | -1.0274 | 3.0E-01 | 1.0E+00 |
| <i>Dialister_propionificiens</i>         | 4.6897  | -0.0092 | 0.0153 | -0.6026 | 5.5E-01 | 1.0E+00 |
| <i>Veillonella_montpellierensis</i>      | 1.1724  | 0.0035  | 0.0105 | 0.3342  | 7.4E-01 | 1.0E+00 |
| <i>Peptoniphilus_lacrimalis</i>          | NA      | 0.0056  | 0.0043 | 1.3124  | 1.9E-01 | 1.0E+00 |
| <i>Lactobacillus_salivarius</i>          | NA      | NA      | NA     | NA      | NA      | NA      |
| <i>Staphylococcus_devriesei</i>          | -1.7059 | -0.0018 | 0.0094 | -0.1878 | 8.5E-01 | 1.0E+00 |
| <i>Anaerococcus_lactolyticus</i>         | NA      | 0.0085  | 0.0113 | 0.7513  | 4.5E-01 | 1.0E+00 |
| <i>Staphylococcus_capitis</i>            | 1.1724  | -0.0020 | 0.0064 | -0.3216 | 7.5E-01 | 1.0E+00 |
| <i>Peptoniphilus_harei</i>               | NA      | -0.0087 | 0.0108 | -0.8073 | 4.2E-01 | 1.0E+00 |
| <i>Peptostreptococcus_anaerobius</i>     | NA      | NA      | NA     | NA      | NA      | NA      |
| <i>Peptoniphilus_gorbachii</i>           | NA      | NA      | NA     | NA      | NA      | NA      |
| <i>Fusobacterium_nucleatum</i>           | NA      | -0.0070 | 0.0079 | -0.8837 | 3.8E-01 | 1.0E+00 |
| <i>Gardnerella_vaginalis</i>             | 1.3856  | 0.0000  | 0.0099 | -0.0036 | 1.0E+00 | 1.0E+00 |
| <i>Campylobacter_ureolyticus</i>         | NA      | 0.0059  | 0.0080 | 0.7415  | 4.6E-01 | 1.0E+00 |
| <i>Peptococcus_niger</i>                 | NA      | NA      | NA     | NA      | NA      | NA      |
| <i>Corynebacterium_pyruviciproducens</i> | -5.1176 | 0.0026  | 0.0093 | 0.2781  | 7.8E-01 | 1.0E+00 |
| <i>Streptococcus_gallolyticus</i>        | NA      | NA      | NA     | NA      | NA      | NA      |
| <i>Porphyromonas_bennonis</i>            | NA      | 0.0008  | 0.0020 | 0.4159  | 6.8E-01 | 1.0E+00 |
| <i>Prevotella_denticola</i>              | NA      | NA      | NA     | NA      | NA      | NA      |
| <i>Anaeroglobus_geminatus</i>            | NA      | -0.0122 | 0.0081 | -1.5024 | 1.3E-01 | 1.0E+00 |
| <i>Anaerococcus_murdochii</i>            | NA      | -0.0076 | 0.0082 | -0.9244 | 3.6E-01 | 1.0E+00 |
| <i>Propionibacterium_acnes</i>           | NA      | -0.0004 | 0.0028 | -0.1328 | 8.9E-01 | 1.0E+00 |
| <i>Actinomyces_europaeus</i>             | NA      | NA      | NA     | NA      | NA      | NA      |
| <i>Scardovia_wiggisiae</i>               | NA      | NA      | NA     | NA      | NA      | NA      |
| <i>Murdochiella_asaccharolytica</i>      | NA      | 0.0002  | 0.0037 | 0.0600  | 9.5E-01 | 1.0E+00 |
| <i>Rare OTUs</i>                         | -1.7059 | 0.0195  | 0.0175 | 1.1147  | 2.6E-01 | 1.0E+00 |

**Supplementary Table 2. Linear mixed model regression analysis for exploring the association between microbial species abundance and pregnancy status.** To examine if microorganism abundance changes significantly after pregnancy, a binary time variable was created with time=0 for measurements during pregnancy and time=1 for postpartum measurements. Using this binary time variable we performed a linear regression for each microorganism. Abundances were log-transformed and regressed against time adjusted for ethnicity and patient ID, whereby patient ID is modelled as a random effect to account for the correlation between samples of the same individual. Fold changes are reported as NAs if values in one of the two groups are 0 or if the corresponding regression-metrics are non-zero.

| Species                          | Fold Change | Estimate | Std. Error | t value | P value | Q value |
|----------------------------------|-------------|----------|------------|---------|---------|---------|
| <i>Lactobacillus_crispatus</i>   | -2.2915     | -0.6555  | 0.2883     | -2.2739 | 2.3E-02 | 6.7E-01 |
| <i>Lactobacillus_iners</i>       | -2.4702     | -0.2210  | 0.1709     | -1.2936 | 2.0E-01 | 8.9E-01 |
| <i>Lactobacillus_jensenii</i>    | -2.2858     | -0.4816  | 0.2539     | -1.8971 | 5.8E-02 | 8.9E-01 |
| <i>Lactobacillus_gasseri</i>     | -1.4661     | -0.1517  | 0.2472     | -0.6135 | 5.4E-01 | 8.9E-01 |
| <i>Lactobacillus_amylovorus</i>  | -260.6690   | -0.0418  | 0.0801     | -0.5225 | 6.0E-01 | 8.9E-01 |
| <i>Prevotella_timonensis</i>     | 45.2014     | 0.9192   | 0.3169     | 2.9003  | 3.7E-03 | 1.3E-01 |
| <i>Prevotella_bivia</i>          | 178.2422    | 0.5947   | 0.3345     | 1.7781  | 7.5E-02 | 8.9E-01 |
| <i>Streptococcus_agalactiae</i>  | 141.4718    | 0.4491   | 0.2961     | 1.5167  | 1.3E-01 | 8.9E-01 |
| <i>Unclassified</i>              | 11.4152     | 1.0624   | 0.2972     | 3.5745  | 3.5E-04 | 1.4E-02 |
| <i>Atopobium_vaginae</i>         | -38.1866    | -0.0863  | 0.0917     | -0.9408 | 3.5E-01 | 8.9E-01 |
| <i>Fingoldia_magna</i>           | 21.9414     | 0.5846   | 0.1885     | 3.1007  | 1.9E-03 | 6.9E-02 |
| <i>Lactobacillus_delbrueckii</i> | -167.4296   | -0.0484  | 0.0638     | -0.7578 | 4.5E-01 | 8.9E-01 |
| <i>Sneathia_sanguinegens</i>     | NA          | -0.0278  | 0.0526     | -0.5286 | 6.0E-01 | 8.9E-01 |
| <i>Prevotella_disiens</i>        | 153.6941    | 0.4531   | 0.2028     | 2.2344  | 2.5E-02 | 7.1E-01 |
| <i>Prevotella_amnii</i>          | NA          | NA       | NA         | NA      | NA      | NA      |
| <i>Streptococcus_anginosus</i>   | 302.9333    | 0.7621   | 0.2808     | 2.7141  | 6.6E-03 | 2.1E-01 |
| <i>Ureaplasma_parvum</i>         | 2.6371      | 0.0753   | 0.1074     | 0.7008  | 4.8E-01 | 8.9E-01 |
| <i>Anaerococcus_vaginalis</i>    | 31.6893     | 0.6372   | 0.2194     | 2.9039  | 3.7E-03 | 1.3E-01 |
| <i>Aerococcus_christensenii</i>  | -2.7097     | -0.0150  | 0.1089     | -0.1375 | 8.9E-01 | 8.9E-01 |
| <i>Prevotella_buccalis</i>       | 3.7013      | 0.3226   | 0.1237     | 2.6074  | 9.1E-03 | 2.8E-01 |
| <i>Dialister_micraerophilus</i>  | 55.0788     | 0.4407   | 0.1616     | 2.7278  | 6.4E-03 | 2.1E-01 |

|                                          |          |         |        |         |         |         |
|------------------------------------------|----------|---------|--------|---------|---------|---------|
| <i>Prevotella_corporis</i>               | 59.4701  | 0.2892  | 0.2042 | 1.4166  | 1.6E-01 | 8.9E-01 |
| <i>Dialister_propionificaciens</i>       | 51.6722  | 0.3942  | 0.1713 | 2.3010  | 2.1E-02 | 6.4E-01 |
| <i>Veillonella_montpellierensis</i>      | NA       | -0.0113 | 0.0330 | -0.3419 | 7.3E-01 | 8.9E-01 |
| <i>Peptoniphilus_lacrimalis</i>          | 355.0000 | 0.3717  | 0.1782 | 2.0860  | 3.7E-02 | 8.9E-01 |
| <i>Lactobacillus_salivarius</i>          | NA       | 0.0201  | 0.0061 | 3.3051  | 9.5E-04 | 3.6E-02 |
| <i>Staphylococcus_devriesei</i>          | 15.7778  | 0.1133  | 0.1071 | 1.0584  | 2.9E-01 | 8.9E-01 |
| <i>Anaerococcus_lactolyticus</i>         | 36.8148  | 0.3669  | 0.1932 | 1.8987  | 5.8E-02 | 8.9E-01 |
| <i>Staphylococcus_capitis</i>            | 11.5704  | 0.1093  | 0.0709 | 1.5415  | 1.2E-01 | 8.9E-01 |
| <i>Peptoniphilus_harei</i>               | 46.5444  | 0.2067  | 0.1333 | 1.5504  | 1.2E-01 | 8.9E-01 |
| <i>Peptostreptococcus_anaerobius</i>     | NA       | 0.3284  | 0.0473 | 6.9379  | 4.0E-12 | 1.8E-10 |
| <i>Peptoniphilus_gorbachii</i>           | NA       | 0.1000  | 0.0253 | 3.9524  | 7.7E-05 | 3.2E-03 |
| <i>Fusobacterium_nucleatum</i>           | 27.4533  | 0.0903  | 0.1253 | 0.7208  | 4.7E-01 | 8.9E-01 |
| <i>Gardnerella_vaginalis</i>             | 25.7885  | 0.1254  | 0.0937 | 1.3385  | 1.8E-01 | 8.9E-01 |
| <i>Campylobacter_ureolyticus</i>         | 14.8762  | 0.1085  | 0.0908 | 1.1953  | 2.3E-01 | 8.9E-01 |
| <i>Peptococcus_niger</i>                 | NA       | 0.1531  | 0.0287 | 5.3412  | 9.2E-08 | 4.0E-06 |
| <i>Corynebacterium_pyruviciproducens</i> | 1.9930   | 0.0794  | 0.0406 | 1.9561  | 5.0E-02 | 8.9E-01 |
| <i>Streptococcus_gallolyticus</i>        | NA       | NA      | NA     | NA      | NA      | NA      |
| <i>Porphyromonas_bennonis</i>            | 757.3333 | 0.2864  | 0.1429 | 2.0044  | 4.5E-02 | 8.9E-01 |
| <i>Prevotella_denticola</i>              | NA       | NA      | NA     | NA      | NA      | NA      |
| <i>Anaeroglobus_geminatus</i>            | -1.1268  | 0.0378  | 0.0353 | 1.0687  | 2.9E-01 | 8.9E-01 |
| <i>Anaerococcus_murdochii</i>            | 24.6133  | 0.1225  | 0.0773 | 1.5846  | 1.1E-01 | 8.9E-01 |
| <i>Propionibacterium_acnes</i>           | 137.2667 | 0.1311  | 0.1008 | 1.2999  | 1.9E-01 | 8.9E-01 |
| <i>Actinomyces_europaeus</i>             | NA       | 0.0795  | 0.0242 | 3.2885  | 1.0E-03 | 3.7E-02 |
| <i>Scardovia_wiggisiae</i>               | NA       | 0.1006  | 0.0298 | 3.3781  | 7.3E-04 | 2.8E-02 |
| <i>Murdochiella_asaccharolytica</i>      | 50.4889  | 0.1511  | 0.0832 | 1.8150  | 7.0E-02 | 8.9E-01 |
| <i>Rare OTUs</i>                         | 6.9502   | 0.4082  | 0.1079 | 3.7842  | 1.5E-04 | 6.3E-03 |



**Supplementary Table 3. Linear mixed model regression analysis for examining CSTs across pregnancy timepoints.** To test if CSTs change significantly over the course of pregnancy we excluded postpartum measurements and performed a linear regression for each CST. A CST indicator variable was created where CST=1 for samples that could be assigned to the given CST and CST=0 for all other samples. Time was regressed against CST adjusted for ethnicity and patient ID, whereby patient ID is modelled as a random effect to account for the correlation between samples of the same individual.

| CST      | 08-12    | 19-25    | 27-30    | 32-36    | Estimate | Std. Error | t value | P value | Q value |
|----------|----------|----------|----------|----------|----------|------------|---------|---------|---------|
| <b>1</b> | 13 (46%) | 17 (46%) | 17 (43%) | 13 (37%) | 0.1553   | 0.1868     | 0.8312  | 4.1E-01 | 9.3E-01 |
| <b>2</b> | 2 (7%)   | 3 (8%)   | 5 (12%)  | 3 (9%)   | -0.1253  | 0.3163     | -0.3963 | 6.9E-01 | 9.3E-01 |
| <b>3</b> | 7 (25%)  | 11 (30%) | 12 (30%) | 12 (36%) | -0.2094  | 0.2031     | -1.0314 | 3.0E-01 | 9.3E-01 |
| <b>4</b> | 2 (7%)   | 0 (0%)   | 0 (0%)   | 1 (3%)   | 0.6234   | 0.6319     | 0.9865  | 3.2E-01 | 9.3E-01 |
| <b>5</b> | 4 (14%)  | 6 (16%)  | 5 (12%)  | 5 (15%)  | 0.0224   | 0.2668     | 0.0841  | 9.3E-01 | 9.3E-01 |
